# Supplementary material for: Quality grade evaluation and the related research ofForsythia suspensafrom different places on the market
Source: Royal Society of Chemistry journal article supplement (doi:10.1039/d1nj03418a), 2021-01-01
Supplement: d1nj03418a1.pdf [file d1nj03418a1.pdf]

## **Supplementary material**

### **Quality grade evaluation and related research of Forsythia suspensa from different places on the market**

## Contents

**Table S1.** Forsythia forsythia and its seed number and information.

**Fig. S1.** Three dimensional chromatogram of sample.

**Table S2.** RSD of Relative retention time and Relative peak area.

**Fig. S2.** Coefficients plot of Fructus Forsythiae seed.

**Table S3.** RSD of the two corresponding fingerprint peaks area.

**Fig. S3.** Y observed versus Y predicted plot for the calibration model of seeds.

**Table S4.** The evaluation parameters ( $S_m$ ,  $P_m$ ,  $\alpha$ ) of the fusion fingerprint.

**Table S1.** Forsythia forsythia and its seed number and information

| Para. | Variety  | Source            | Para. | Variety  | Source            |
|-------|----------|-------------------|-------|----------|-------------------|
| S1    | Qingqiao | Yangcheng, Shanxi | Z1    | Qingqiao | Yangcheng, Shanxi |
| S2    | Laoqiao  | Yangcheng, Shanxi | Z2    | Qingqiao | Changzhi, Shanxi  |
| S3    | Qingqiao | Changzhi, Shanxi  | Z3    | Laoqiao  | Changzhi, Shanxi  |
| S4    | Laoqiao  | Changzhi, Shanxi  | Z4    | Qingqiao | Lantian, Shaanxi  |
| S5    | Qingqiao | Lantian, Shaanxi  | Z5    | Laoqiao  | Lantian, Shaanxi  |
| S6    | Laoqiao  | Lantian, Shaanxi  | Z6    | Laoqiao  | Shangluo, Shaanxi |
| S7    | Qingqiao | Shangluo, Shaanxi | Z7    | Laoqiao  | Xingping, Shaanxi |
| S8    | Laoqiao  | Shangluo, Shaanxi | Z8    | Laoqiao  | Baoji, Shaanxi    |
| S9    | Laoqiao  | Xingping, Shaanxi | Z9    | Laoqiao  | Nanyang, Henan    |
| S10   | Laoqiao  | Baoji, Shaanxi    | Z10   | Laoqiao  | Yichuan, Henan    |
| S11   | Qingqiao | Nanyang, Henan    | Z11   | Qingqiao | Yichuan, Henan    |
| S12   | Laoqiao  | Nanyang, Henan    | Z12   | Qingqiao | Xinxiang, Henan   |
| S13   | Qingqiao | Yichuan, Henan    | Z13   | Laoqiao  | Xinxiang, Henan   |
| S14   | Laoqiao  | Yichuan, Henan    | Z14   | Laoqiao  | Luoning, Henan    |
| S15   | Qingqiao | Xinxiang, Henan   | Z15   | Qingqiao | Shangluo, Shaanxi |
| S16   | Laoqiao  | Xinxiang, Henan   |       |          |                   |
| S17   | Laoqiao  | Luoning, Henan    |       |          |                   |

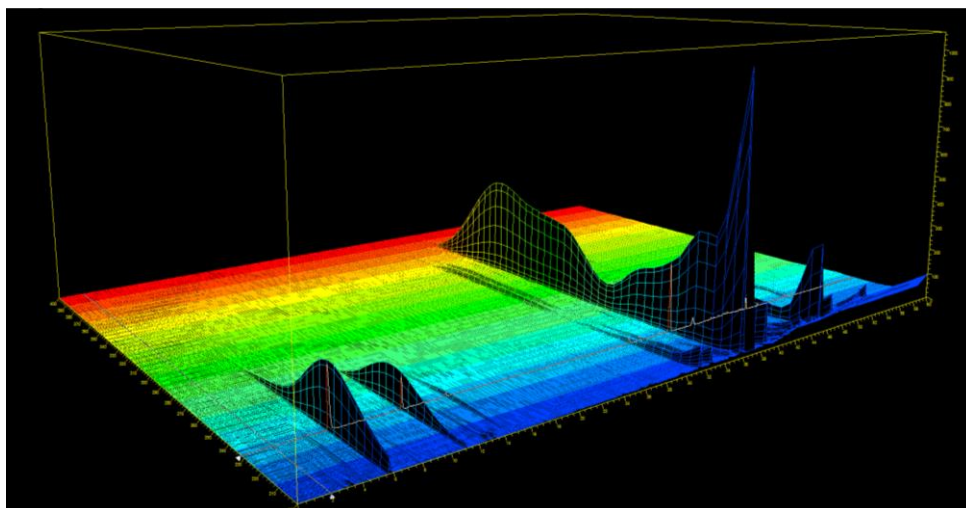

**Fig. S1.** Three dimensional chromatogram of sample

**Table S2.** RSD of Relative retention time and Relative peak area

| Relative retention time(%) |           |               | Relative peak area(%) |       |           |               |           |
|----------------------------|-----------|---------------|-----------------------|-------|-----------|---------------|-----------|
| Para.                      | Precision | Repeatability | Stability             | Para. | Precision | Repeatability | Stability |
| G1                         | 0.03      | 0.08          | 0.05                  | G1    | 0.1       | 0.3           | 0.1       |
| G2                         | 0.05      | 0.10          | 0.03                  | G2    | 1.1       | 0.4           | 0.6       |
| G3                         | 0.03      | 0.07          | 0.02                  | G3    | 0.4       | 0.4           | 0.3       |
| G4                         | 0.10      | 0.03          | 0.01                  | G4    | 0.9       | 0.8           | 0.9       |
| G5                         | 0.01      | 0.02          | 0.03                  | G5    | 0.3       | 0.6           | 0.4       |
| G6                         | 0.01      | 0.01          | 0.00                  | G6    | 0.2       | 1.5           | 0.4       |
| G7                         | 0.01      | 0.03          | 0.02                  | G7    | 0.2       | 0.7           | 1.2       |
| G8                         | 0.01      | 0.02          | 0.04                  | G8    | 0.1       | 0.2           | 0.1       |
| G9                         | 0.00      | 0.00          | 0.00                  | G9    | 0.0       | 0.0           | 0.0       |
| G10                        | 0.04      | 0.05          | 0.05                  | G10   | 0.7       | 1.7           | 0.9       |
| G11                        | 0.04      | 0.06          | 0.03                  | G11   | 0.3       | 1.6           | 0.3       |
| G12                        | 0.03      | 0.08          | 0.02                  | G12   | 0.1       | 0.8           | 1.1       |
| G13                        | 0.02      | 0.10          | 0.01                  | G13   | 1.2       | 1.1           | 1.0       |
| G14                        | 0.02      | 0.07          | 0.00                  | G14   | 0.1       | 0.4           | 0.1       |
| G15                        | 0.03      | 0.03          | 0.01                  | G15   | 0.4       | 0.6           | 1.6       |

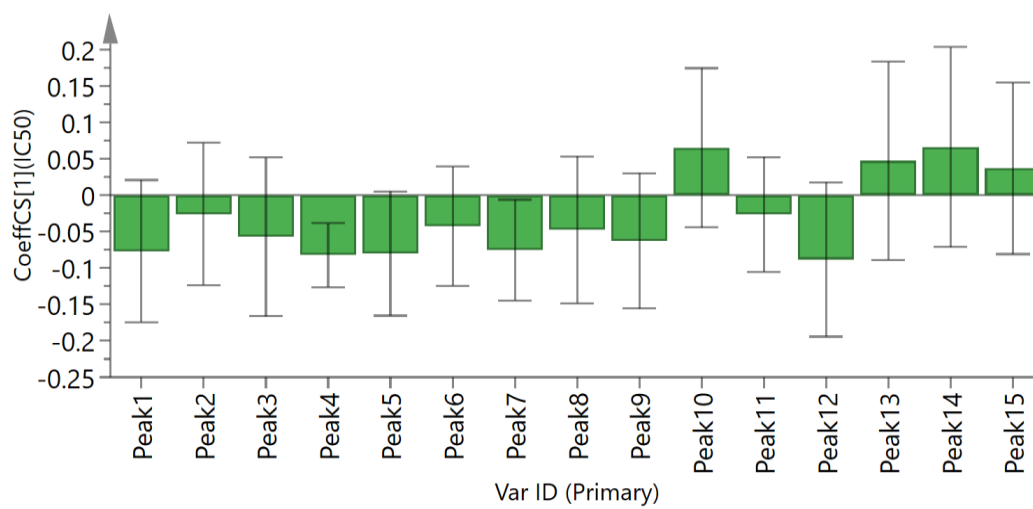

**Fig. S2.** Coefficients plot of Fructus Forsythiae seed

**Table S3.** RSD of the two corresponding fingerprint peaks area

| Peak area of Forsythiaside |           |               |           | Peak area of Phillyrin |           |               |           |
|----------------------------|-----------|---------------|-----------|------------------------|-----------|---------------|-----------|
| Para.                      | Precision | Repeatability | Stability | Para.                  | Precision | Repeatability | Stability |
| 1                          | 2159.3    | 2174.0        | 2112.2    | 1                      | 3429.8    | 3387.0        | 3355.7    |
| 2                          | 2097.4    | 2181.0        | 2128.5    | 2                      | 3329.8    | 3493.7        | 3384.0    |
| 3                          | 2133.2    | 2285.3        | 2201.7    | 3                      | 3388.2    | 3469.4        | 3368.9    |
| 4                          | 2214.7    | 2298.4        | 2141.2    | 4                      | 3515.7    | 3318.7        | 3399.7    |
| 5                          | 2239.9    | 2178.0        | 2276.6    | 5                      | 3553.6    | 3596.6        | 3525.4    |
| 6                          | 2266.4    | 2214.6        | 2218.8    | 6                      | 3593.9    | 3429.5        | 3607.1    |
| RSD(%)                     | 3.00      | 2.53          | 2.91      | RSD(%)                 | 2.95      | 2.76          | 2.97      |

Notes: The above repeatability peak area is the average value of double needles

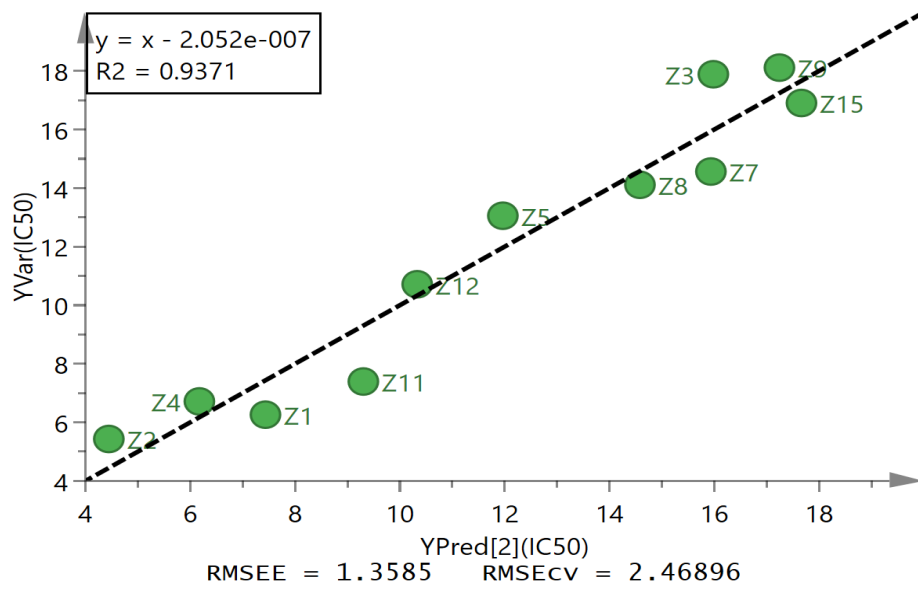

**Fig. S3.** Y observed versus Y predicted plot for the calibration model of seeds.



**Table S4.** The evaluation parameters ( $S_m$ ,  $P_m$ ,  $\alpha$ ) of the fusion fingerprint

| Forsythia forsythia |       |         |          | Forsythia forsythia seed |       |       |          |
|---------------------|-------|---------|----------|--------------------------|-------|-------|----------|
| Para.               | $S_m$ | $P_m$   | $\alpha$ | Para.                    | $S_m$ | $P_m$ | $\alpha$ |
| S1                  | 0.972 | 113.800 | 0.027    | Z1                       | 117.1 | 0.011 | 0.977    |
| S2                  | 0.892 | 50.000  | 0.223    | Z2                       | 135.6 | 0.08  | 0.965    |
| S3                  | 0.980 | 119.300 | 0.061    | Z3                       | 24.8  | 0.023 | 0.859    |
| S4                  | 0.737 | 10.300  | 0.017    | Z4                       | 105.3 | 0.003 | 0.966    |
| S5                  | 0.969 | 93.500  | 0.070    | Z5                       | 49.2  | 0.27  | 0.942    |
| S6                  | 0.881 | 40.400  | 0.372    | Z6                       | 23.6  | 0.286 | 0.886    |
| S7                  | 0.981 | 74.900  | 0.035    | Z7                       | 28.2  | 0.167 | 0.901    |
| S8                  | 0.840 | 12.800  | 0.227    | Z8                       | 31.6  | 0.07  | 0.897    |
| S9                  | 0.885 | 46.200  | 0.112    | Z9                       | 53.1  | 0.349 | 0.907    |
| S10                 | 0.842 | 24.900  | 0.104    | Z10                      | 44.6  | 0.327 | 0.907    |
| S11                 | 0.986 | 113.600 | 0.007    | Z11                      | 80.4  | 0.012 | 0.983    |
| S12                 | 0.781 | 27.900  | 0.316    | Z12                      | 116.1 | 0.01  | 0.973    |
| S13                 | 0.977 | 100.400 | 0.049    | Z13                      | 108.7 | 0.011 | 0.969    |
| S14                 | 0.866 | 27.900  | 0.240    | Z14                      | 30.3  | 0.043 | 0.899    |
| S15                 | 0.982 | 123.600 | 0.051    | Z15                      | 80.6  | 0.15  | 0.933    |
| S16                 | 0.966 | 109.900 | 0.045    |                          |       |       |          |
| S17                 | 0.801 | 20.900  | 0.175    |                          |       |       |          |
